# Supplementary material for: Temperature-induced physiological stress and reproductive characteristics of the migratory seahorse Hippocampus erectus during a thermal stress simulation
Source: PubMed Central journal article supplement (PMC6031341; doi:10.1242/bio.032888), 2018-05-15
Supplement: biolopen-7-032888-s1.pdf [file biolopen-7-032888-s1.pdf]

Table S1. Nucleotide sequences used in qPCR assays with the lined seahorse  
*Hippocampus erectus*

| Gene                   | Primer   | 5'-3' sequence          |
|------------------------|----------|-------------------------|
| <i>β-actin</i>         | Actin-F  | GGGACCTGACTGACTACCTC    |
|                        | Actin-R  | TCATACTCCTGCTTGCTGAT    |
| <i>Hsp60</i>           | HSP60F3  | CGCCTTTCCAAGCCAGTC      |
|                        | HSP60R3  | TGTAACCACGGTCAAACCTTCAT |
| <i>Hsp70</i>           | HSP70F4  | ATGGTGTCAGCGAAAGGC      |
|                        | HSP70R4  | CCGTGTTGCTCGGGTTC       |
| <i>Leptin receptor</i> | lepr qF  | CCTACAACCTCAGTGGGAAGAAC |
|                        | lepr qR  | TGTACGGTGCAGTCCTGAAC    |
| <i>Leptin</i>          | lepa qF  | CGACAAGCTCATCTCAGACTC   |
|                        | lepa qR  | AGGATGTCCTTGACTCTGACC   |
| <i>FSH</i>             | FSHqF2   | ATGCAGCTAGTTGTCATGAC    |
|                        | FSHqR2   | TGTTTCACTTTGTAGGTCCAG   |
| <i>cGnRH</i>           | cGnRH qF | GTTGAGTCCGACACCTTTGG    |
|                        | cGnRH qR | GCCTCCAGGATACCAACCAT    |
| <i>sGnRH</i>           | sGnRH qF | CCTTGCGTAGCTGAGATGGAG   |
|                        | sGnRH qR | TACATTGTATGGTCGACGTCTC  |

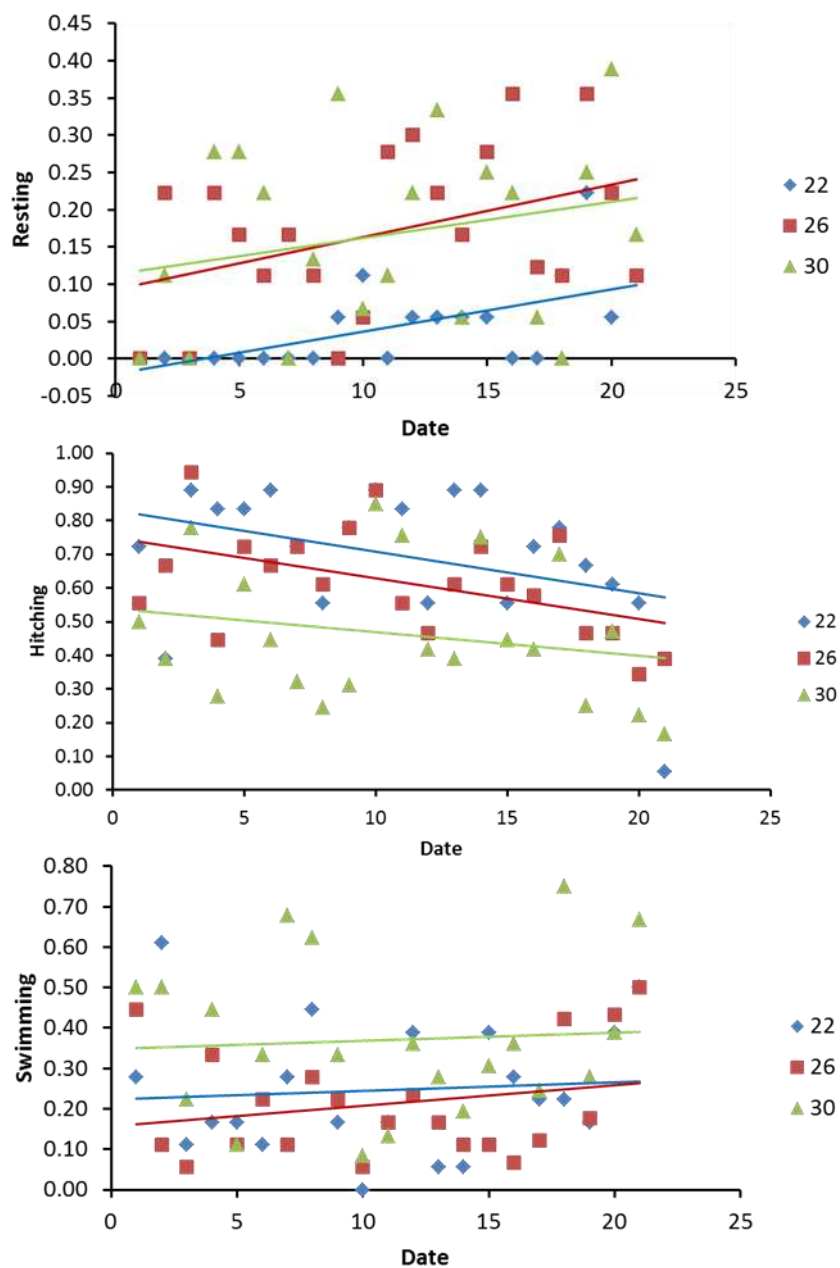

Fig. S1 Behavior of all seahorses throughout the course of chronic treatment (n=18 seahorses per temperature).

Behavioral categories include hitching (tail attached to a substrate), swimming (body moving freely in the water column), and resting (body making contact with bottom of tank but not attached to any substrate).
